# Supplementary material for: Cobalt(ii) terpyridine complexes: synthesis, characterization, antiproliferative activity and molecular docking with proteins and DNA
Source: Royal Society of Chemistry journal article supplement (doi:10.1039/d3nj03445c), 2023-01-01
Supplement: d3nj03445c1.pdf [file d3nj03445c1.pdf]

## Support Information

### **Cobalt (II) terpyridine complexes: synthesis, characterization, antiproliferative activity and molecular docking with proteins and DNA**

Min Chen,<sup>a</sup> Jiahe Li,<sup>a</sup> Benwei Wang,<sup>a</sup> Zhiyuan Wang,<sup>a</sup> Xin Guan,<sup>a</sup> Hongming Liu,<sup>\*a</sup> Lixia Pan,<sup>\*b</sup> Hailan Chen<sup>\*c,d</sup> and Zhen Ma<sup>\*a</sup>

<sup>a</sup> School of Chemistry and Chemical Engineering, Guangxi University, 530004 Nanning, Guangxi, People's Republic of China. E-mail: [hongming9224@126.com](mailto:hongming9224@126.com) (H. Liu), [mzmz2009@sohu.com](mailto:mzmz2009@sohu.com) (Z. Ma).

<sup>b</sup> National Engineering Research Center for Non-Food Biorefinery, State Key Laboratory of Non-Food Biomass and Enzyme Technology, Guangxi Academy of Sciences, Nanning 530007, Guangxi, People's Republic of China. [panlixia@gxas.cn](mailto:panlixia@gxas.cn) (L. Pan)

<sup>c</sup> School of Animal Science and Technology, Guangxi University, 530004, Nanning, Guangxi, People's Republic of China. E-mail: [hlchen319@163.com](mailto:hlchen319@163.com).

<sup>d</sup> Guangxi Key Laboratory of Marine Natural Products and Combinatorial Biosynthesis Chemistry, Guangxi Beibu Gulf Marine Research Center, Guangxi Academy of Sciences, Nanning 530007, Guangxi, People's Republic of China

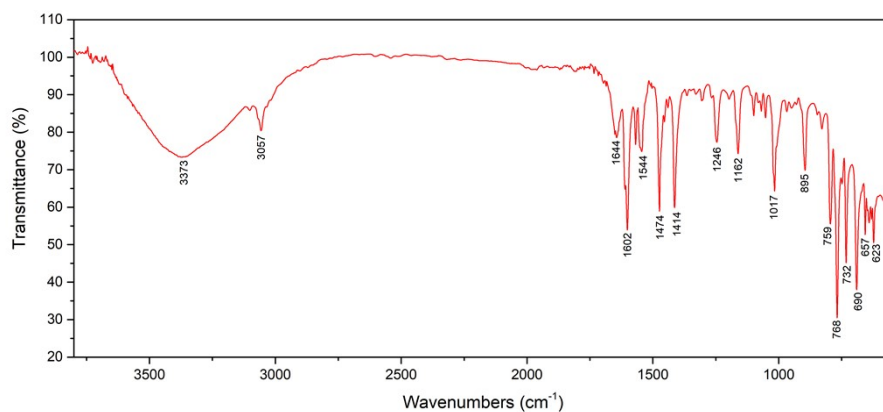

**Figure S1.** The IR diagram of complex  $[\text{Co}(\text{L}^1)_2]\text{Cl}_2$  (**1**)

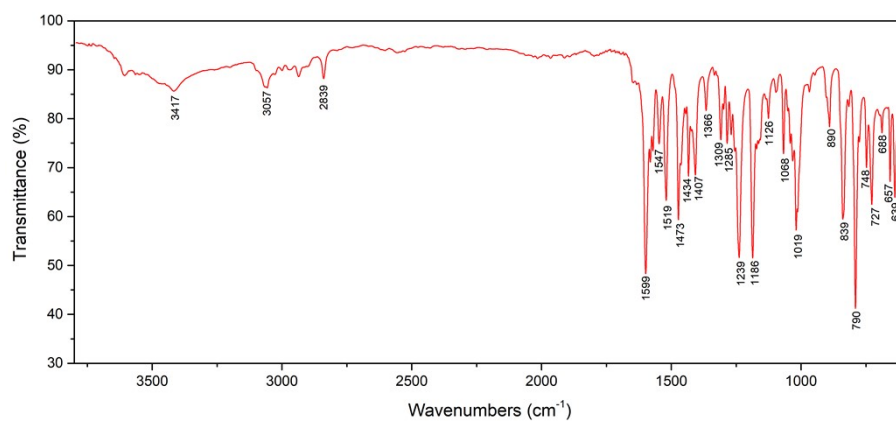

**Figure S2.** The IR diagram of complex  $[\text{Co}(\text{L}^2)_2]\text{Cl}_2$  (**2**)

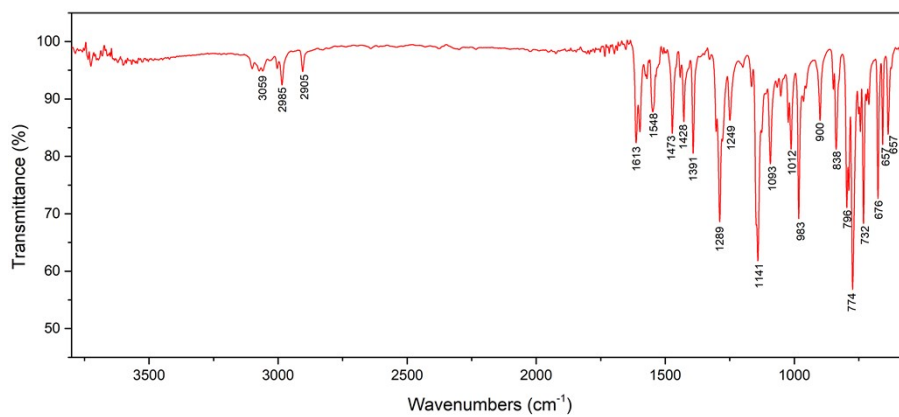

**Figure S3.** The IR diagram of complex  $[\text{Co}(\text{L}^3)_2]\text{Cl}_2$  (**3**)

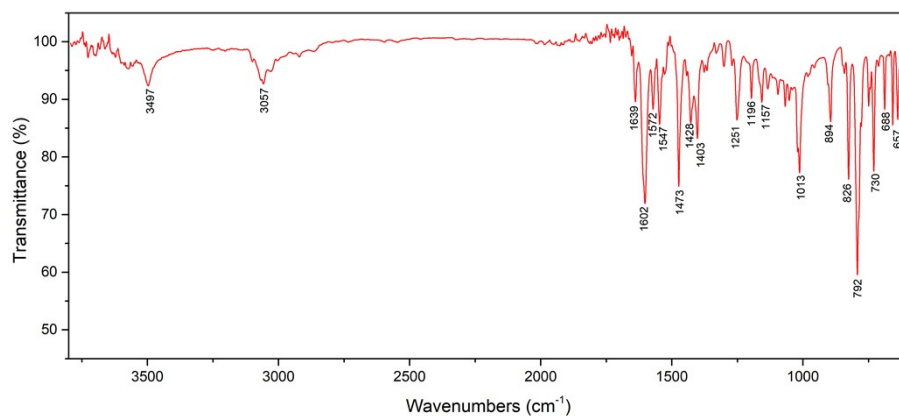

**Figure S4.** The IR diagram of complex  $[\text{Co}(\text{L}^4)_2]\text{Cl}_2$  (**4**)

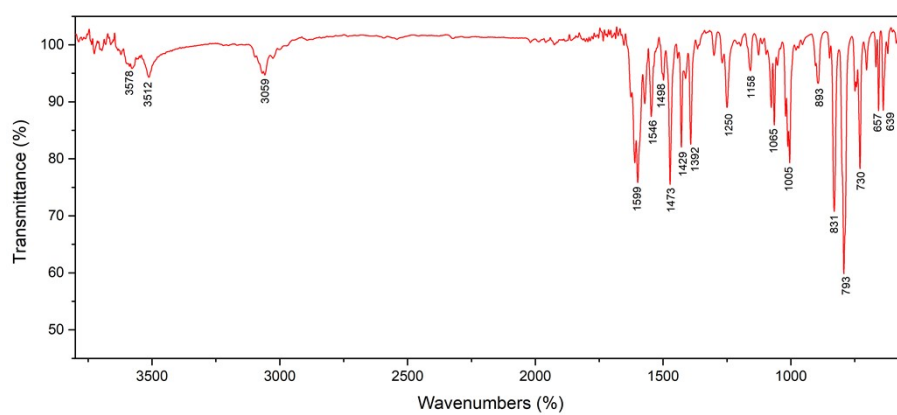

**Figure S5.** The IR diagram of complex  $[\text{Co}(\text{L}^5)_2]\text{Cl}_2$  (**5**)

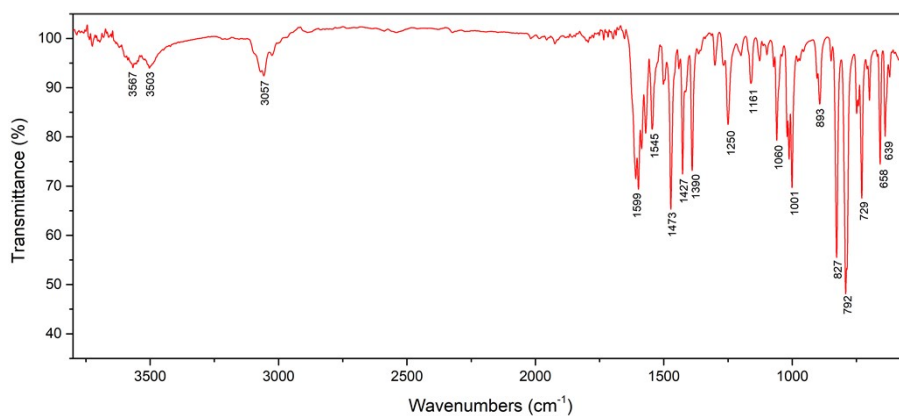

**Figure S6.** The IR diagram of complex  $[\text{Co}(\text{L}^6)_2]\text{Cl}_2$  (**6**)

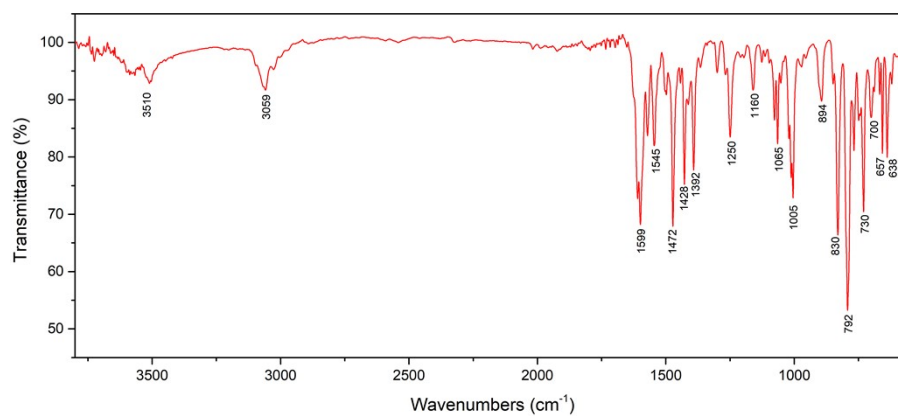

**Figure S7.** The IR diagram of complex  $[\text{Co}(\text{L}^7)_2]\text{Cl}_2$  (**7**)

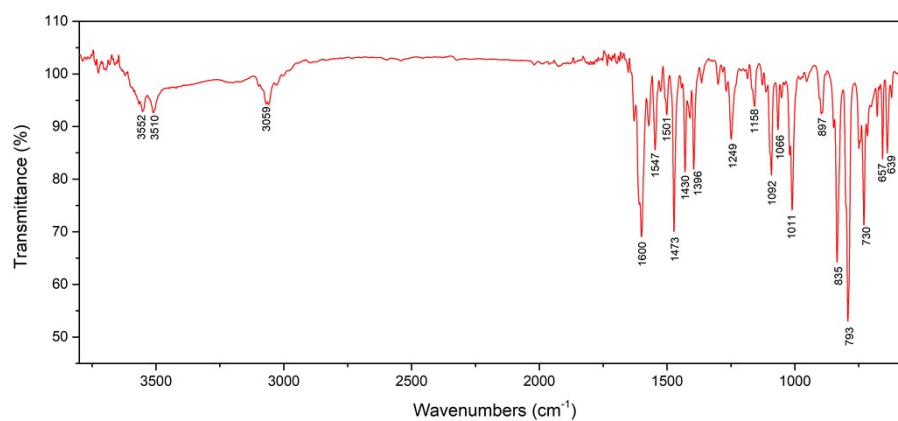

**Figure S8.** The IR diagram of complex  $[\text{Co}(\text{L}^8)_2]\text{Cl}_2$  (**8**)

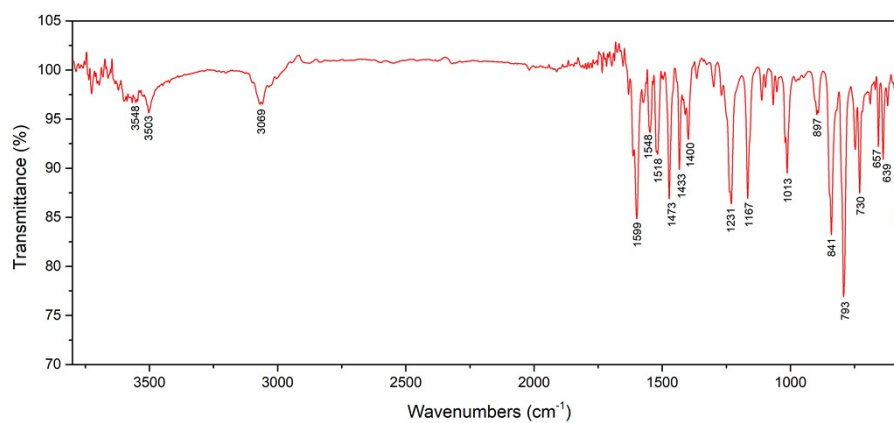

**Figure S9.** The IR diagram of complex  $[\text{Co}(\text{L}^9)_2]\text{Cl}_2$  (**9**)

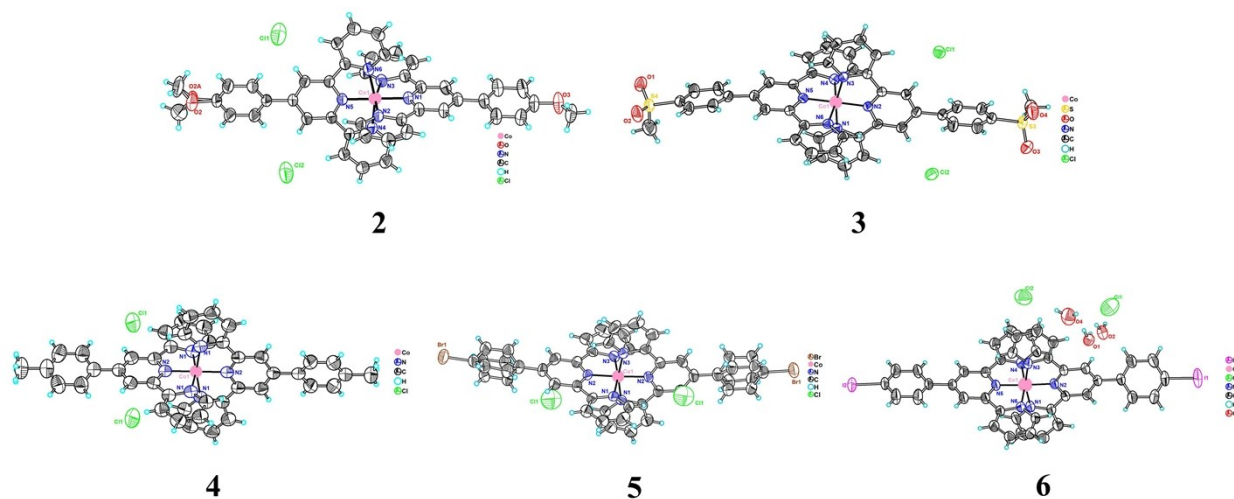

**Figure S10.** The crystallographic structure diagram of complexes 2-6.

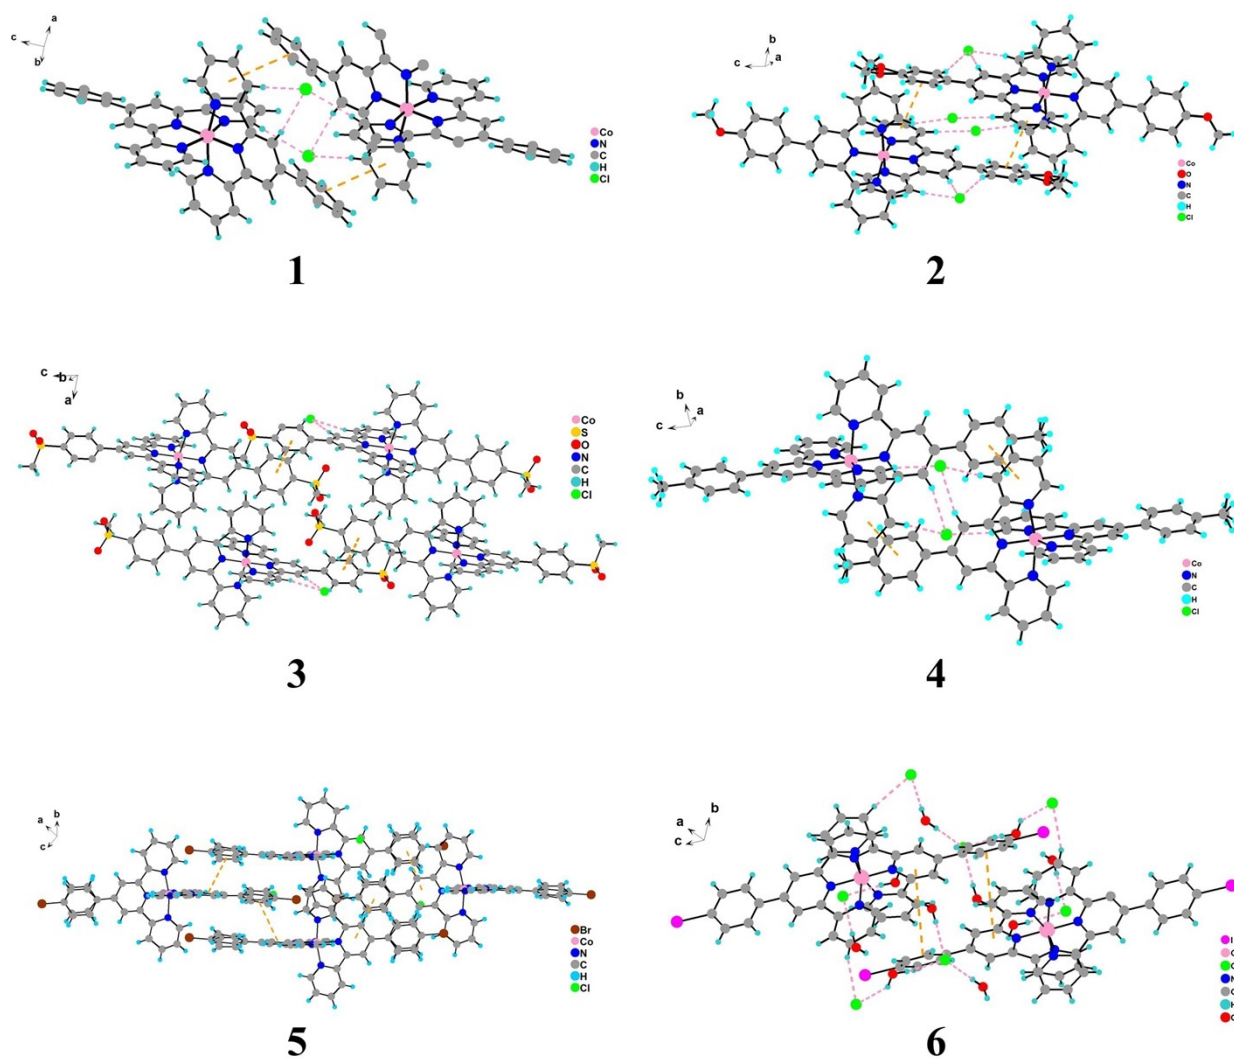

**Figure S11.** The packing diagram of complex 1-6.

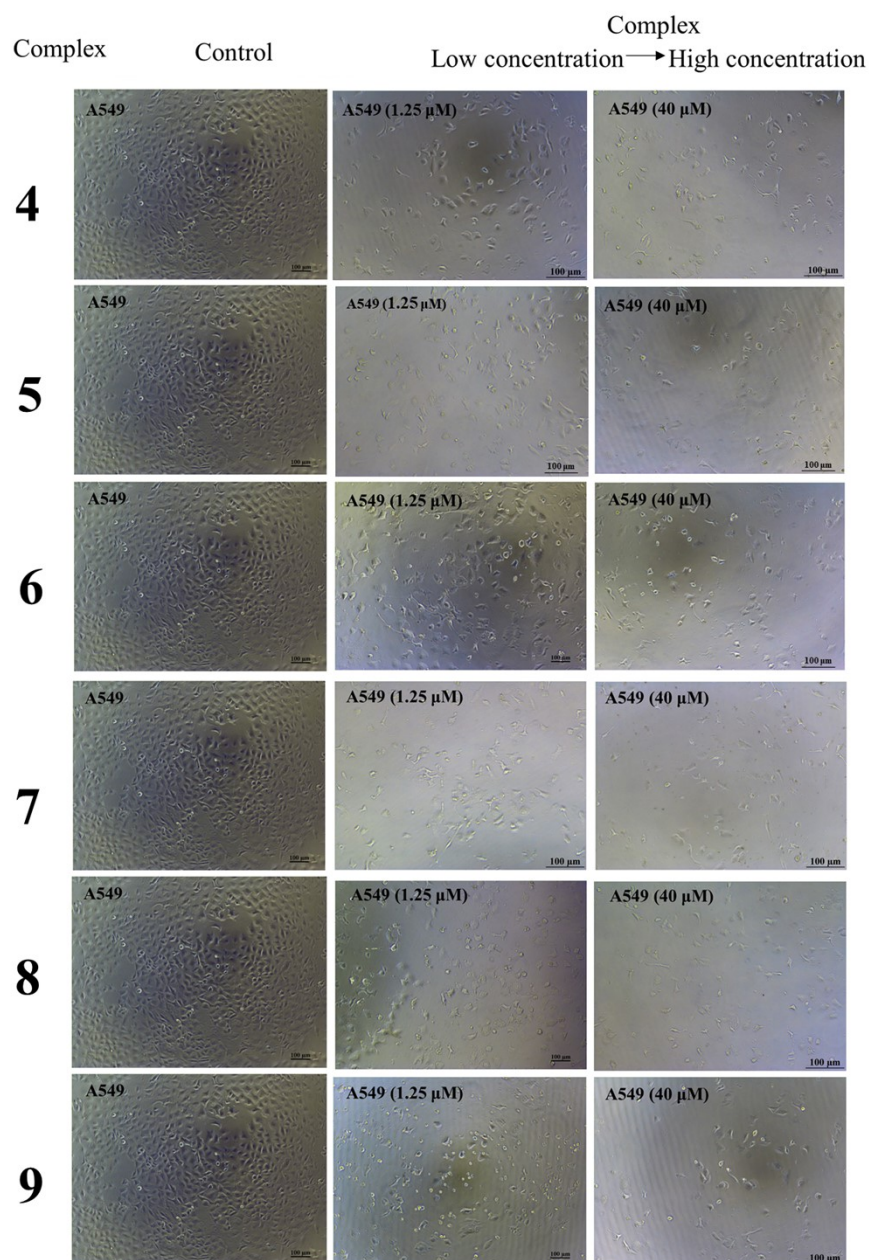

**Figure S12.** The microscopic images of A549 cells treated with increased concentrations of complexes **4-9**.



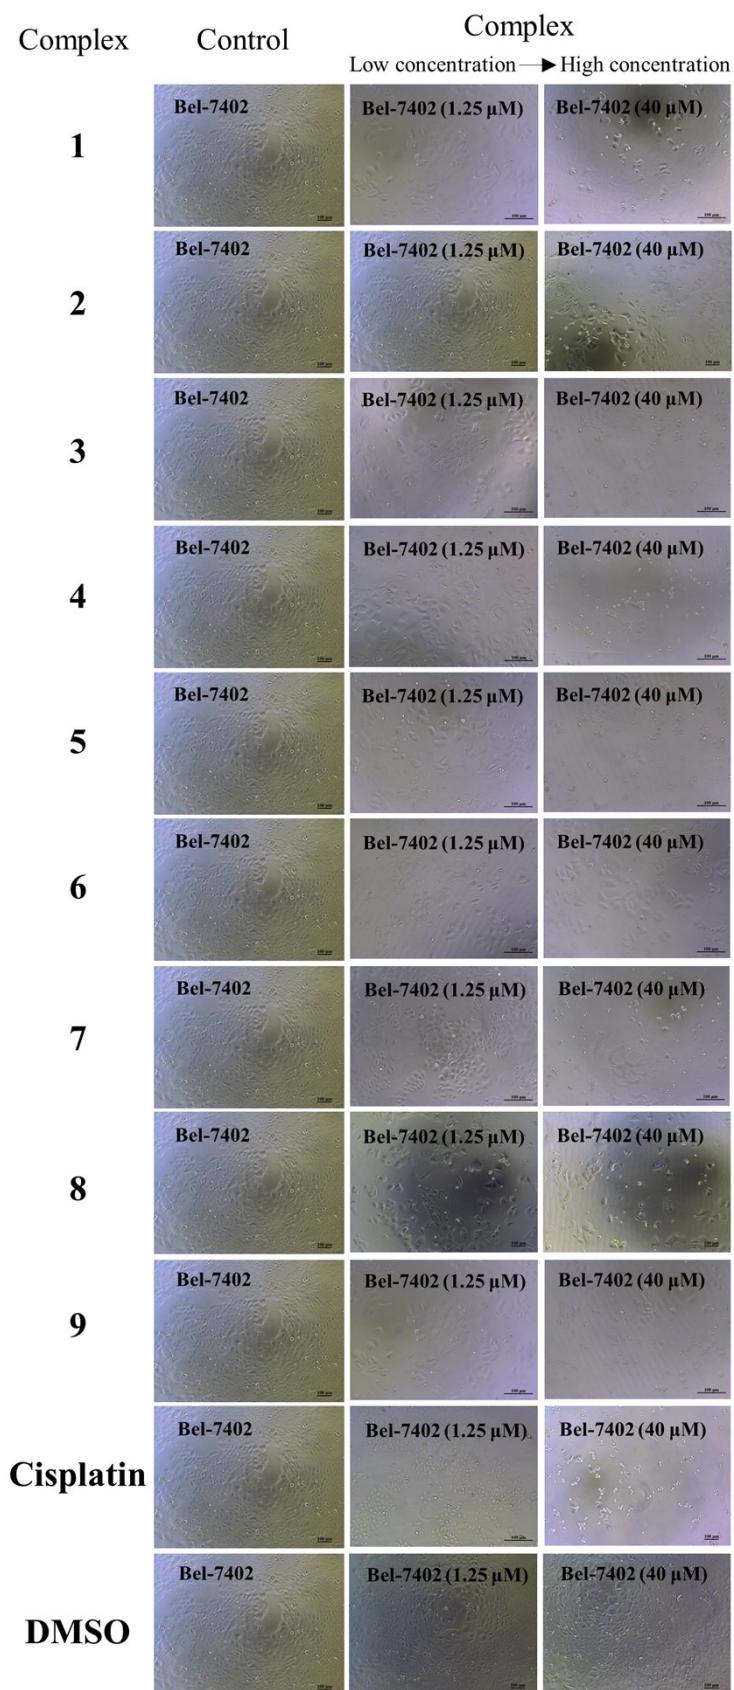

**Figure S13.** The microscopic images of Bel-7402 cells treated with increased concentrations of complexes **1-9**, cisplatin and DMSO.

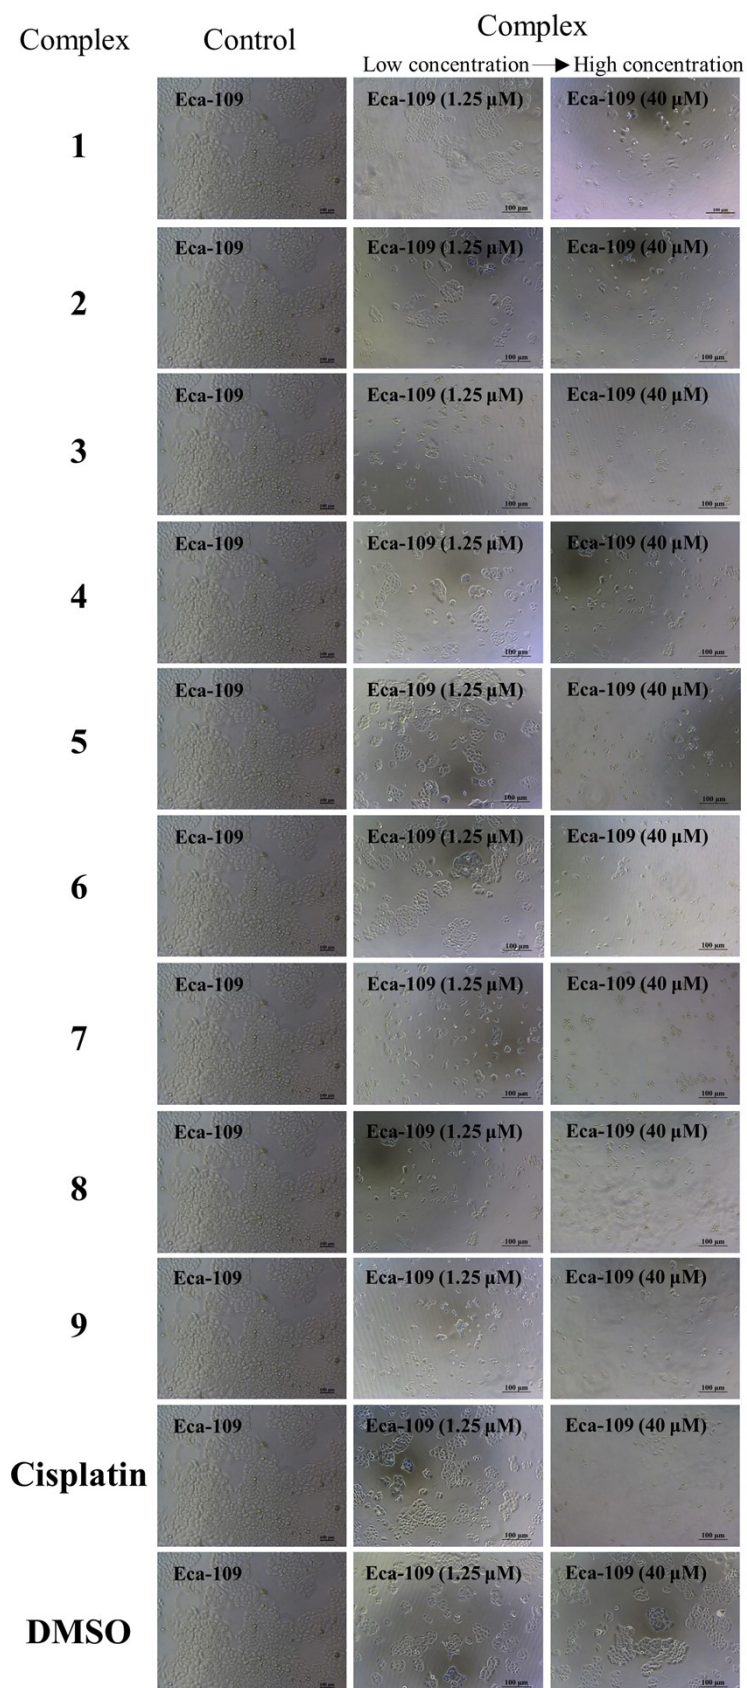

**Figure S14.** The microscopic images of Eca-109 cells treated with increased concentrations of complexes 1-9, cisplatin and DMSO.



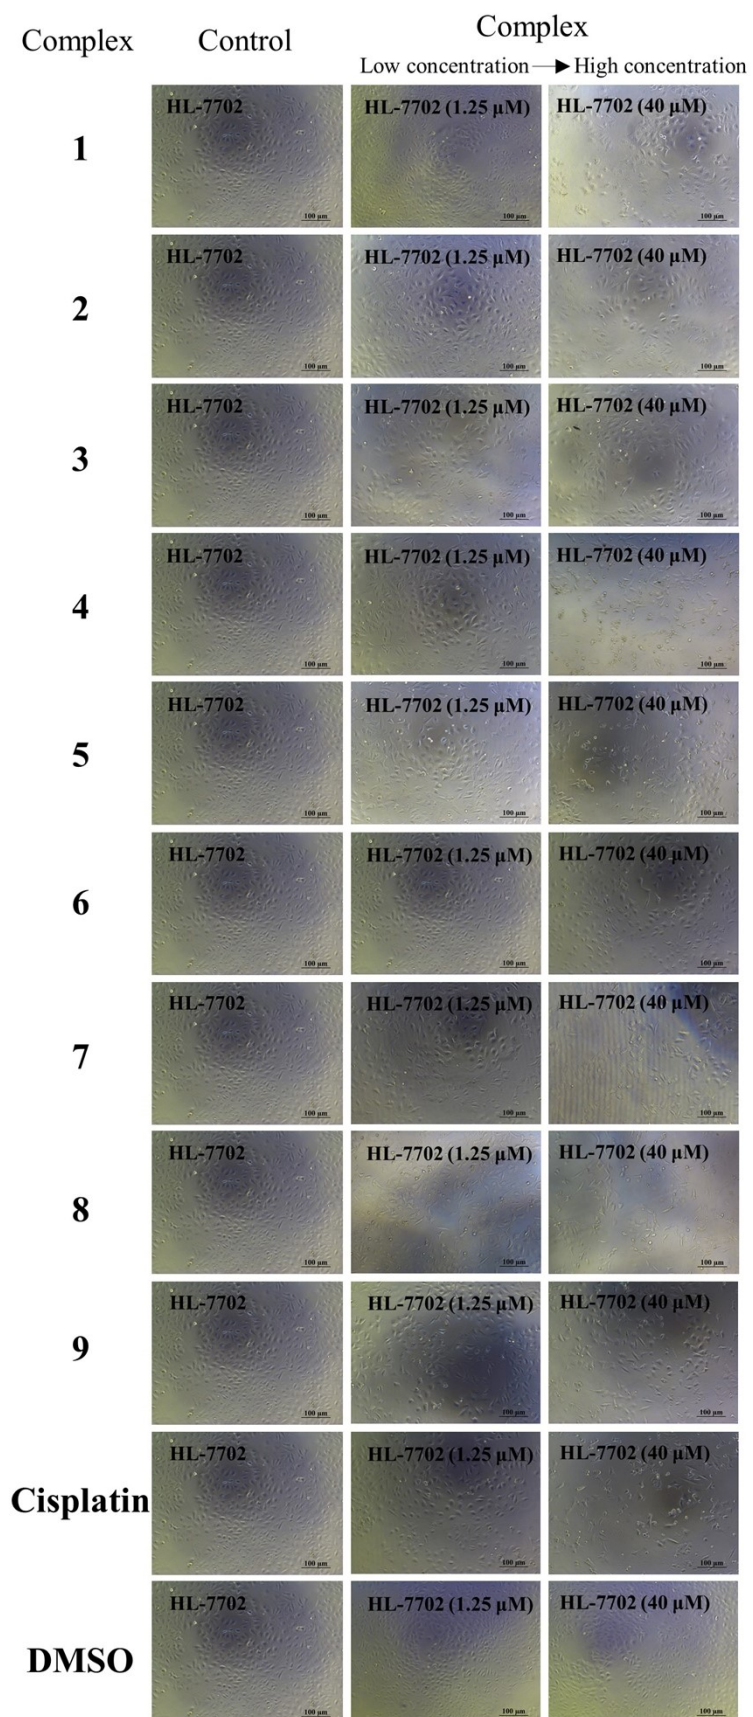

**Figure S15.** The microscopic images of HL-7702 cells treated with increased concentrations of complexes **1-9**, cisplatin and DMSO.

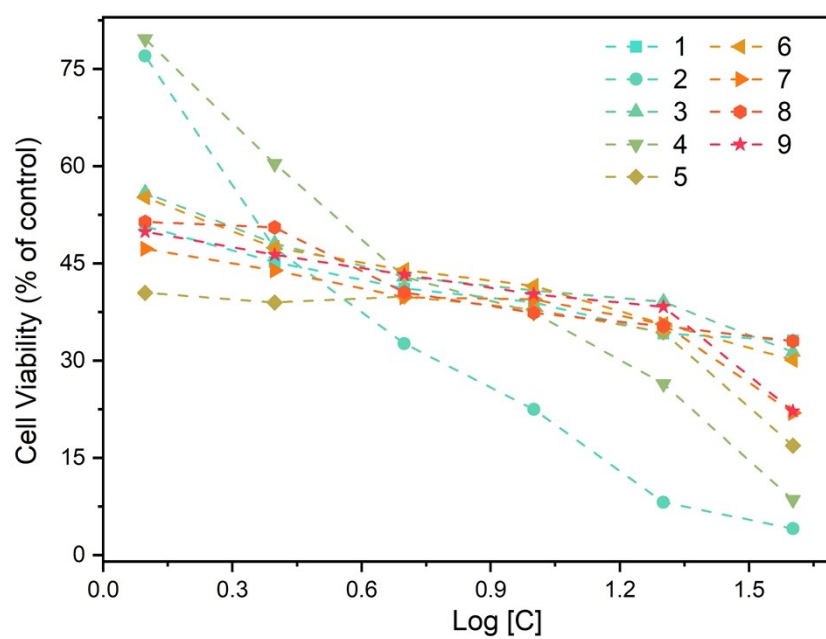

**Figure S16.** The curves of the cell viability vs. the concentration of complexes **1-9** against Bel-7402 cell line.

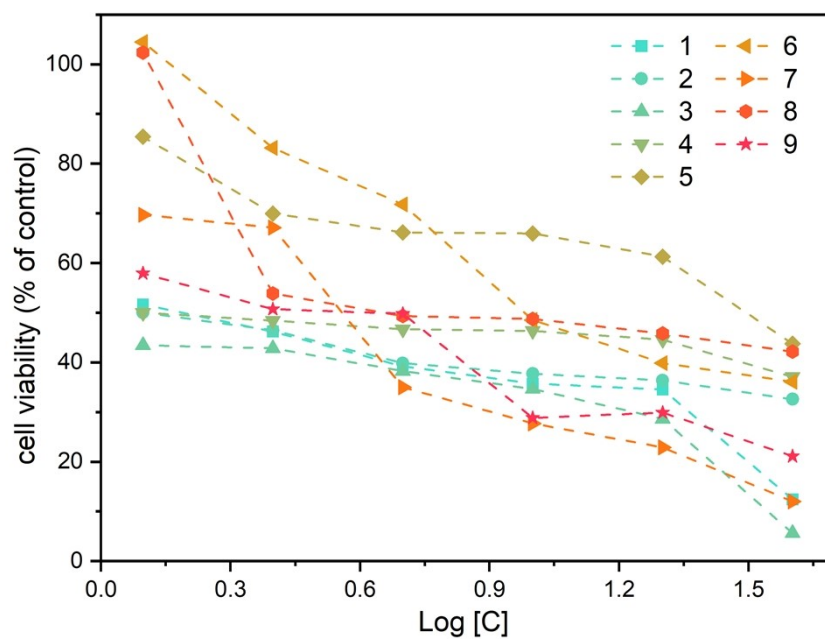

**Figure S17.** The curves of the cell viability vs. the concentration of complexes **1-9** against Eca-109 cell line.

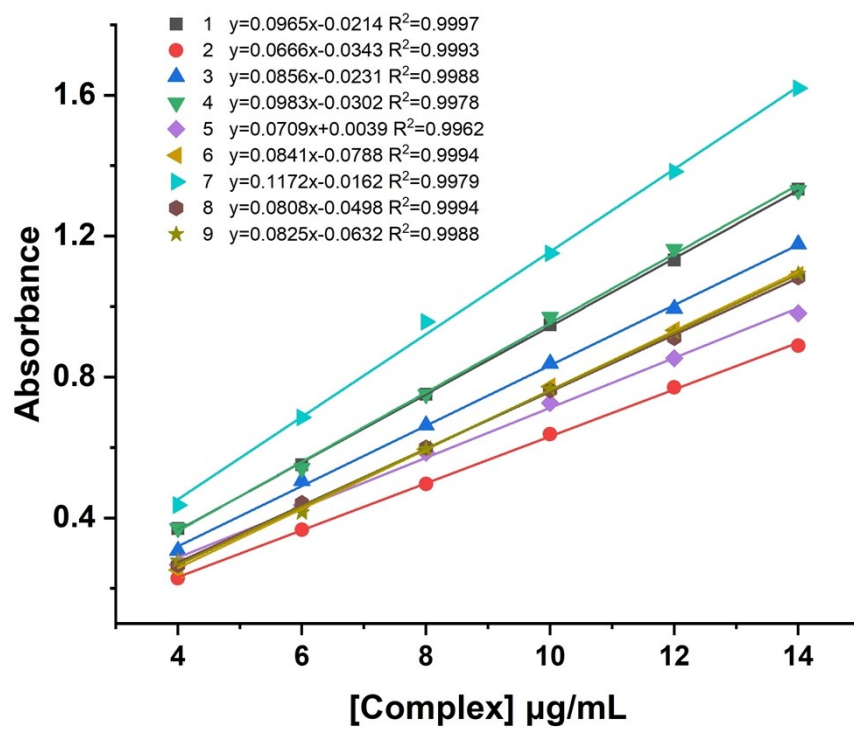

**Figure S18.** The standard curves of UV-Vis spectra for complexes 1-9.

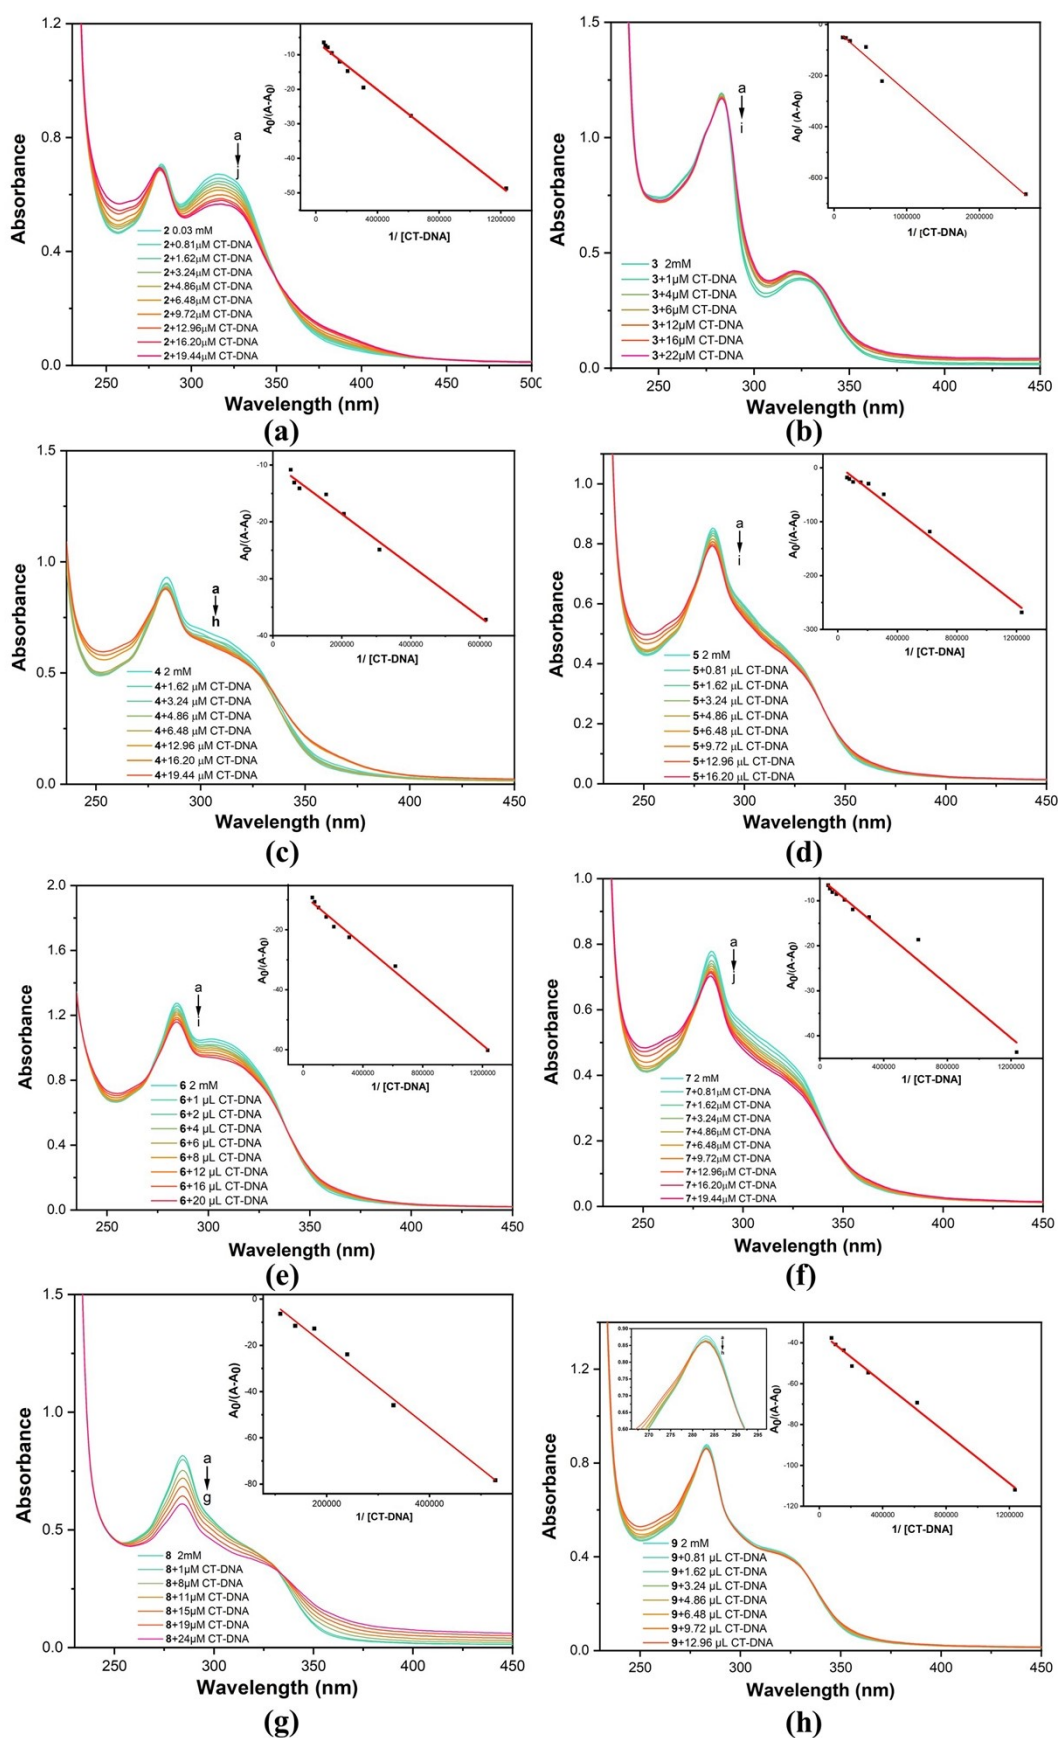

**Figure S19.** UV-vis spectra of complexes 2-9 (a-h) in the different concentrations of CT-DNA in Tris-HCl  $1.0 \times 10^{-3}$  (pH 7.2).



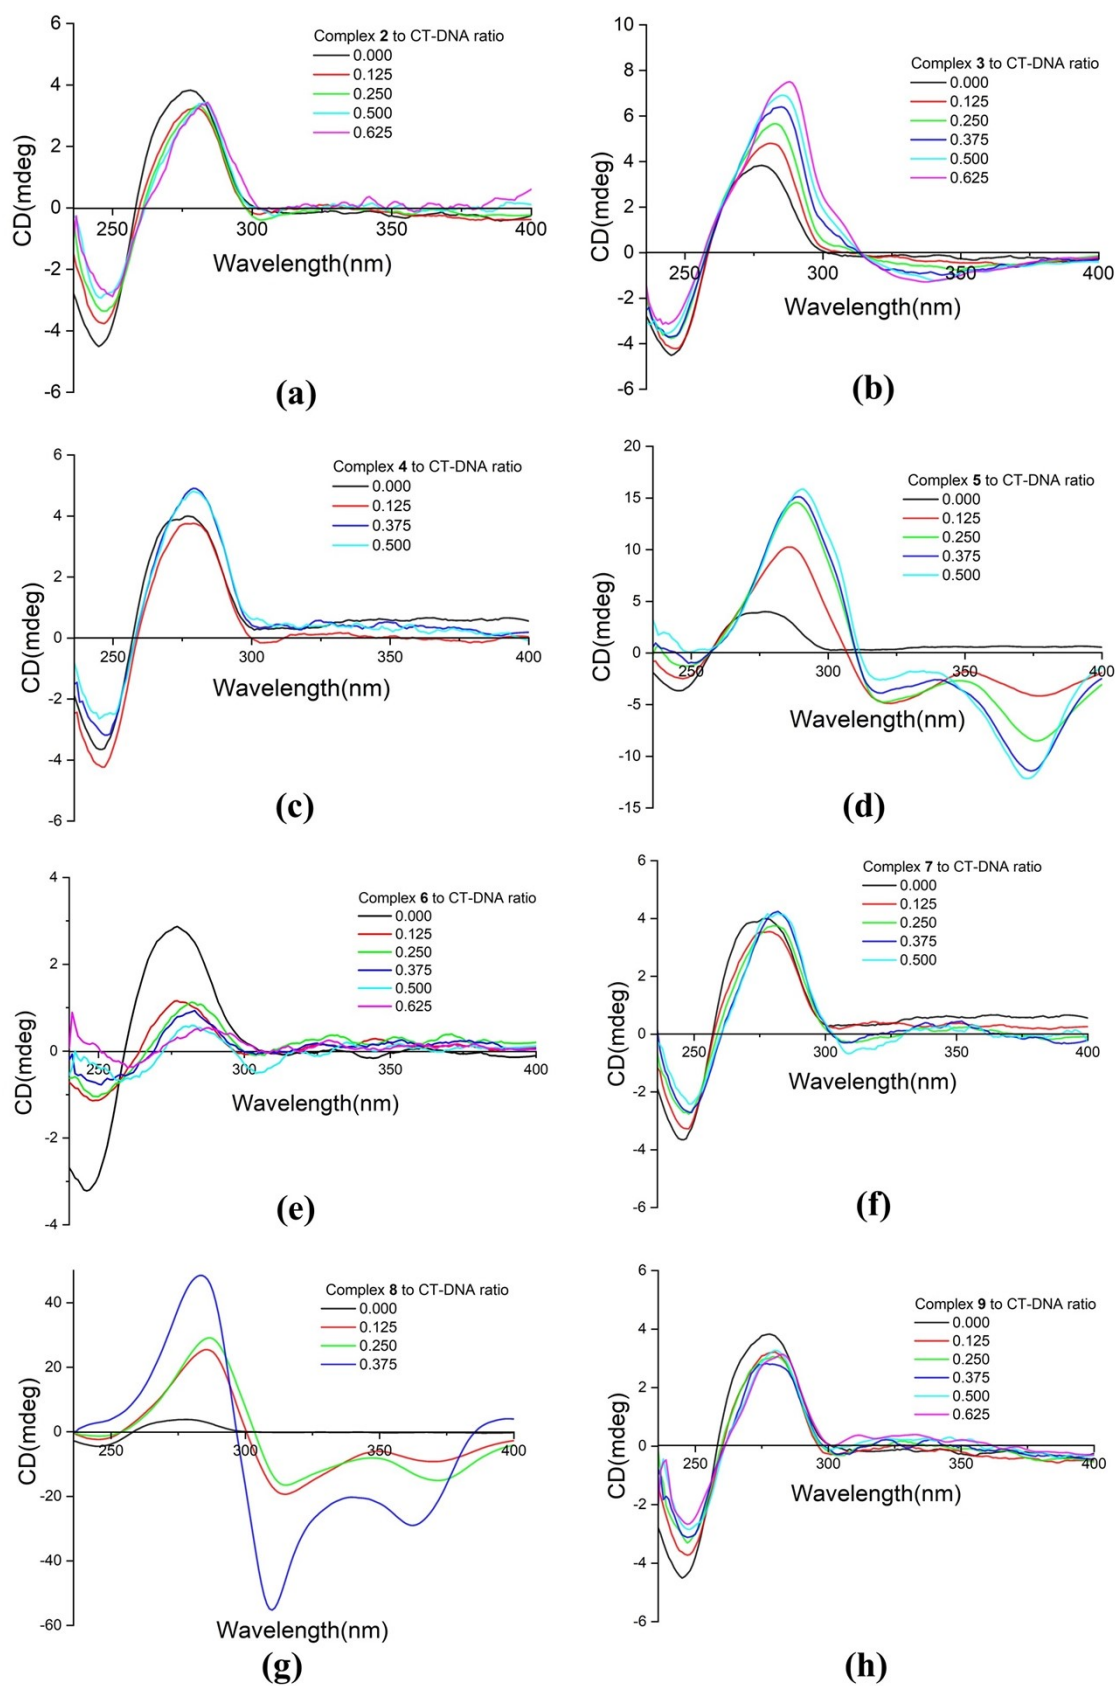

**Figure S20.** CD spectra of CT-DNA in the presence of complexes 2-9.

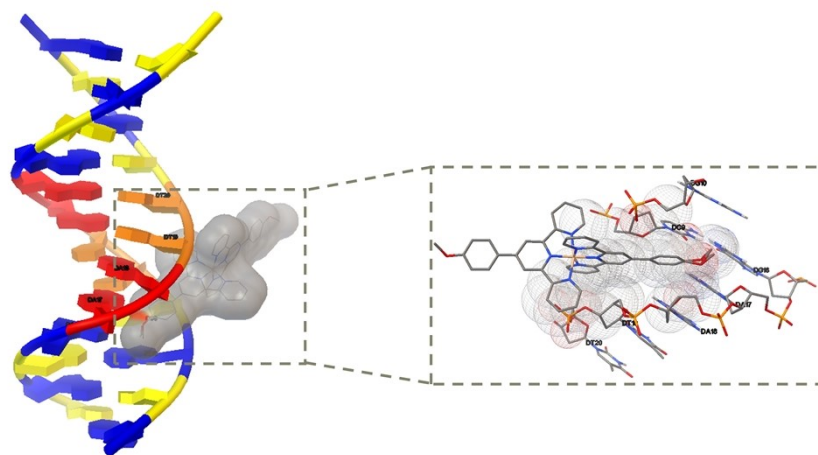

**Figure S21.** View of the energy minimized docked poses of complex **2** with B-DNA (PDB ID: 1BNA).

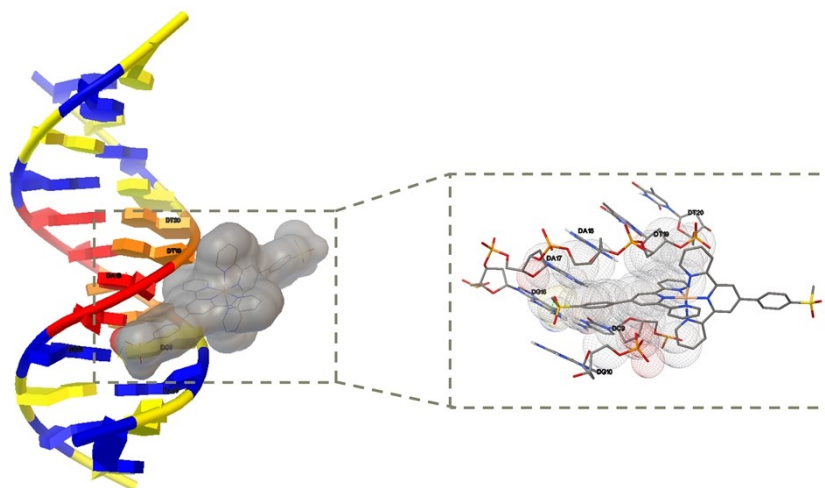

**Figure S22.** View of the energy minimized docked poses of complex **3** with B-DNA (PDB ID: 1BNA).

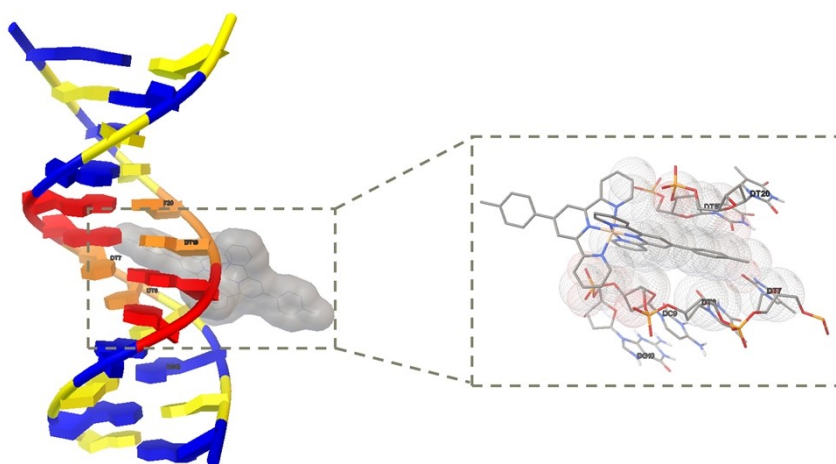

**Figure S23.** View of the energy minimized docked poses of complex **4** with B-DNA (PDB ID: 1BNA).

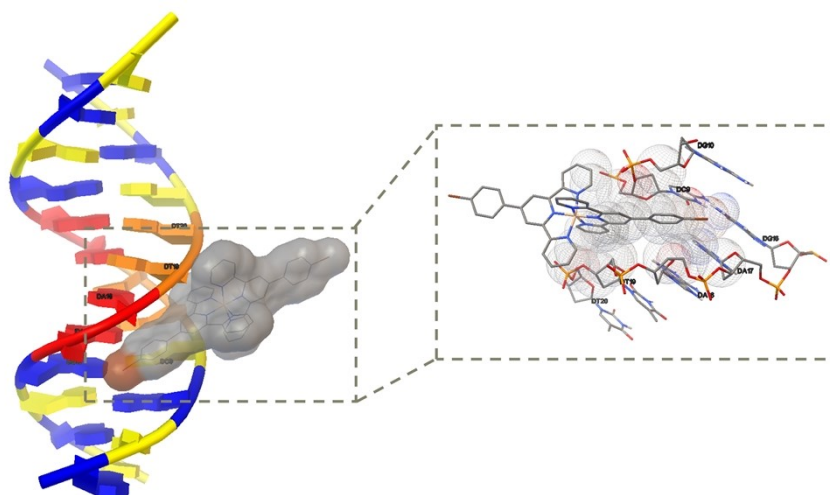

**Figure S24.** View of the energy minimized docked poses of complex **5** with B-DNA (PDB ID: 1BNA).

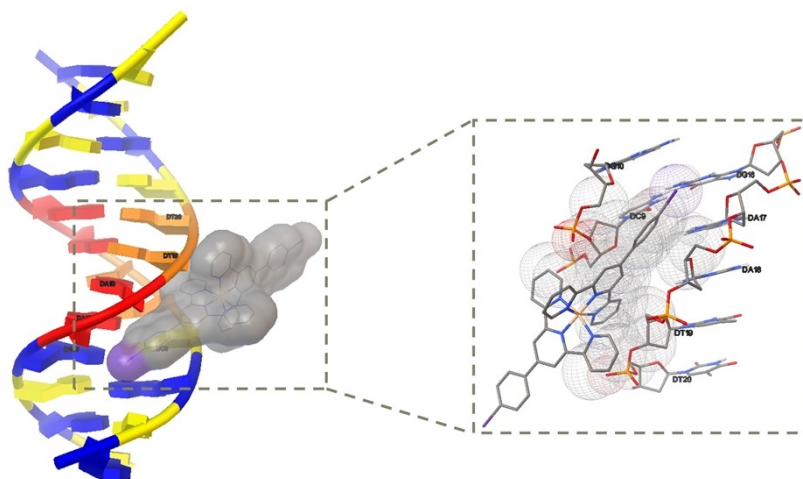

**Figure S25.** View of the energy minimized docked poses of complex **6** with B-DNA (PDB ID: 1BNA).

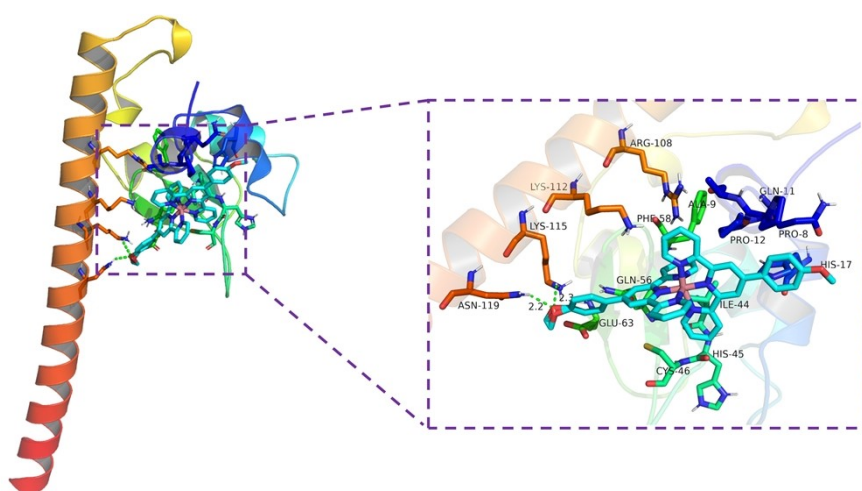

**Figure S26.** Binding modes of complex **2** with survivin protein (PDB ID: 3UIH).

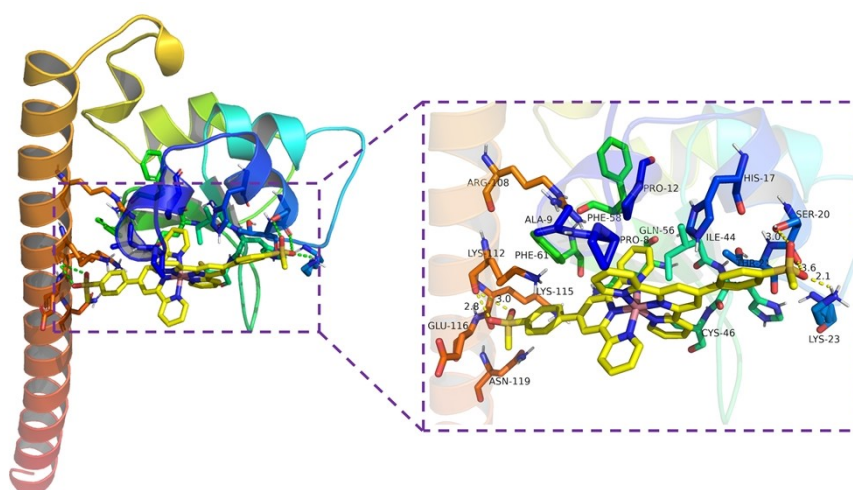

**Figure S27.** Binding modes of complex **3** with survivin protein (PDB ID: 3UIH).

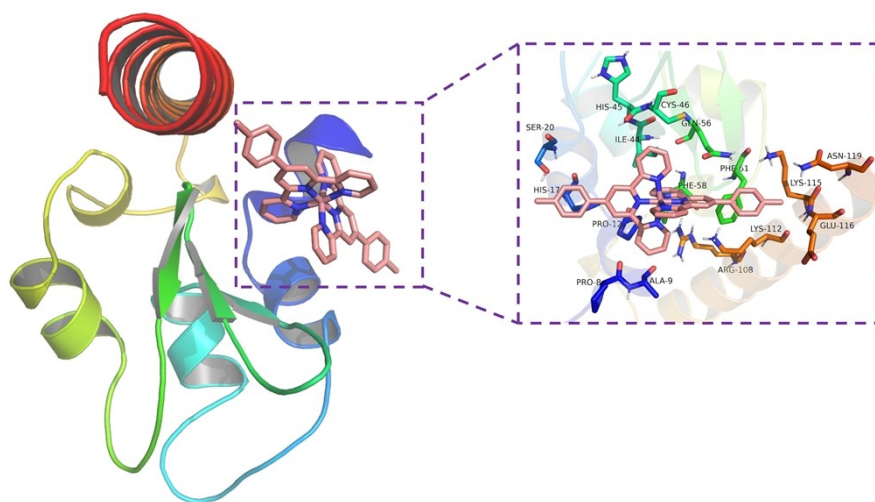

**Figure S28.** Binding modes of complex **4** with survivin protein (PDB ID: 3UIH).

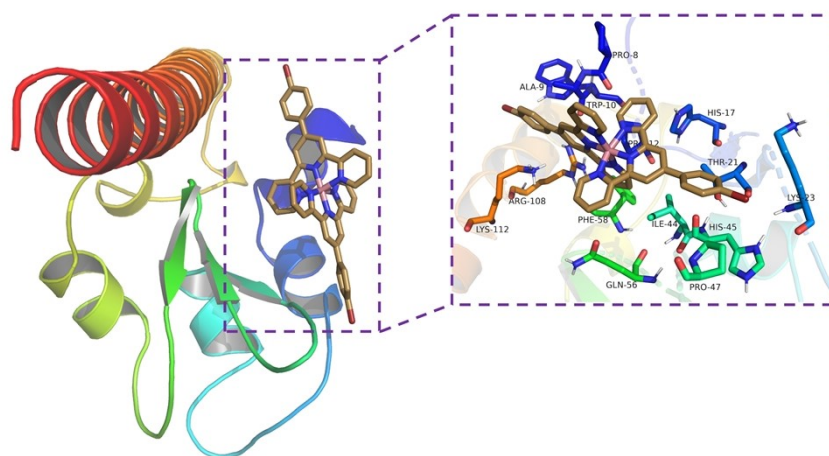

**Figure S29.** Binding modes of complex **5** with survivin protein (PDB ID: 3UIH).



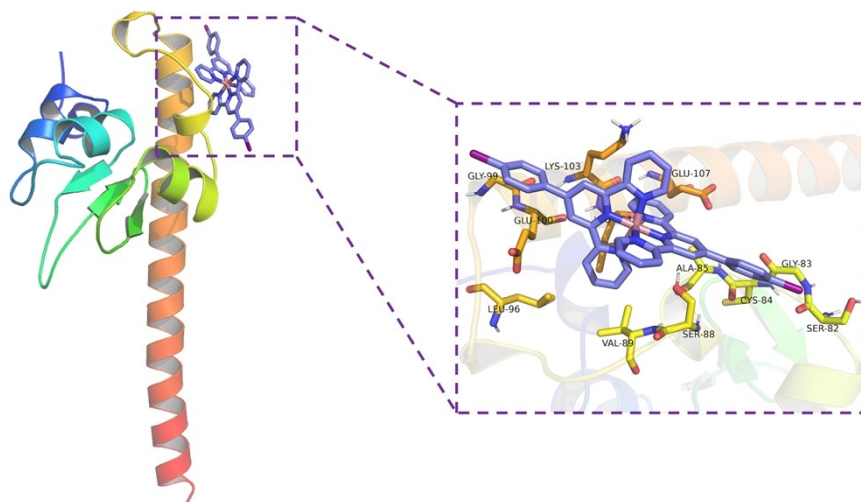

**Figure S30.** Binding modes of complex **6** with survivin protein (PDB ID: 3UIH).

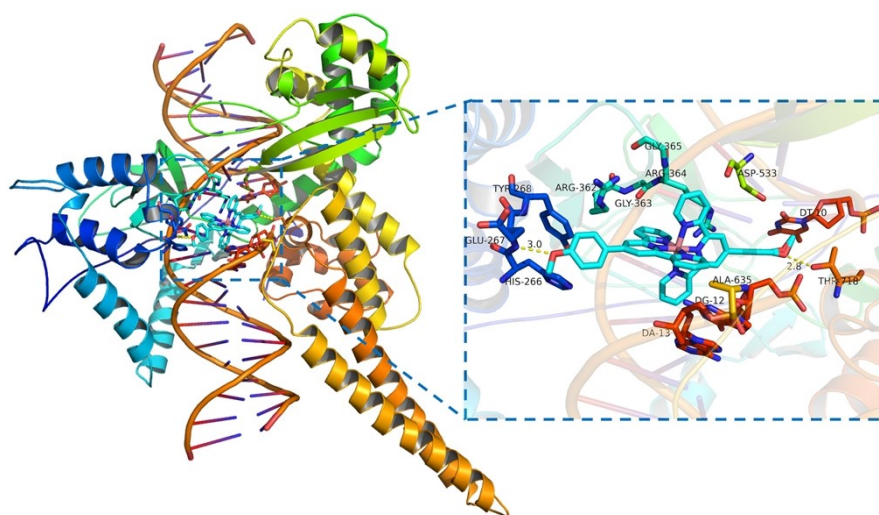

**Figure S31.** Binding modes of complex **2** with Top I (PDB ID: 1T8I).

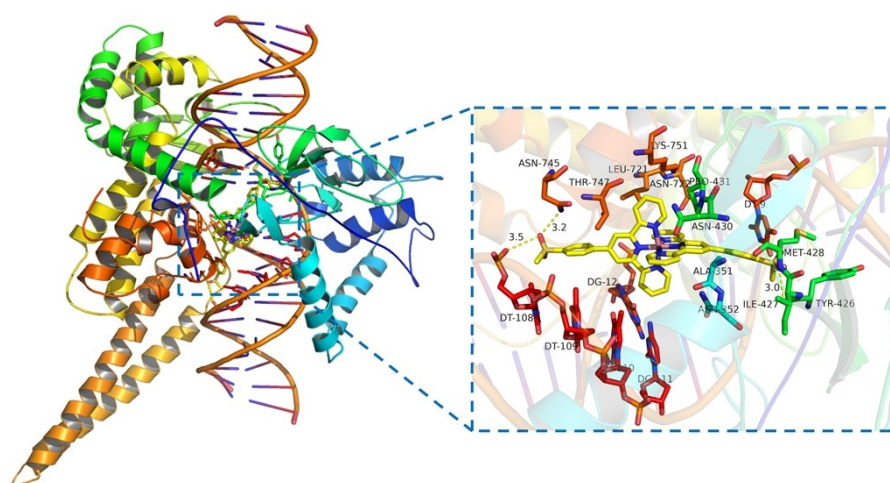

**Figure S32.** Binding modes of complex **3** with Top I (PDB ID: 1T8I).

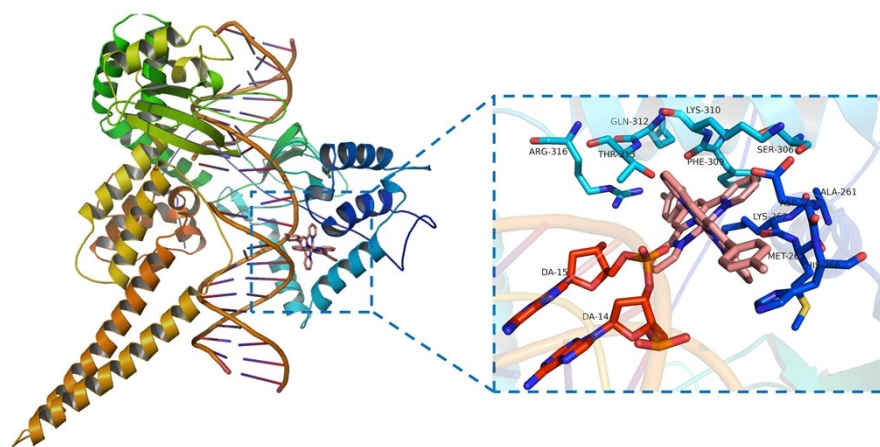

**Figure S33.** Binding modes of complex **4** with Top I (PDB ID: 1T8I).

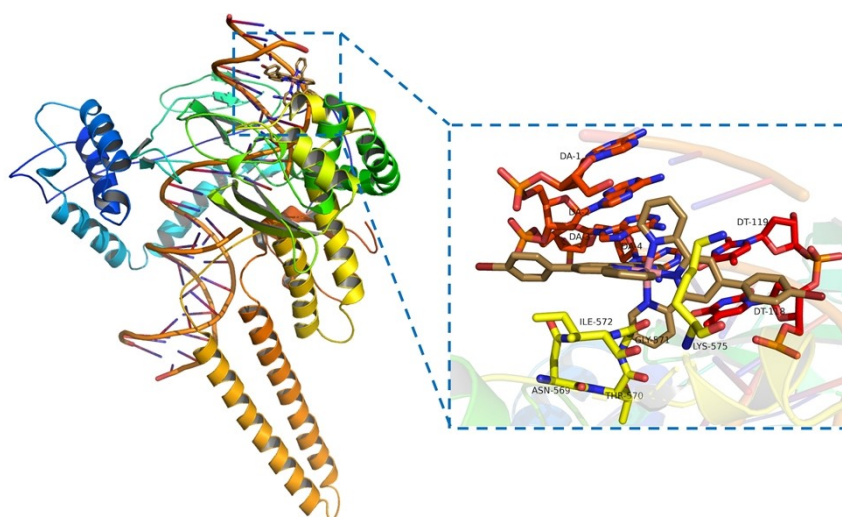

**Figure S34.** Binding modes of complex **5** with Top I (PDB ID: 1T8I).

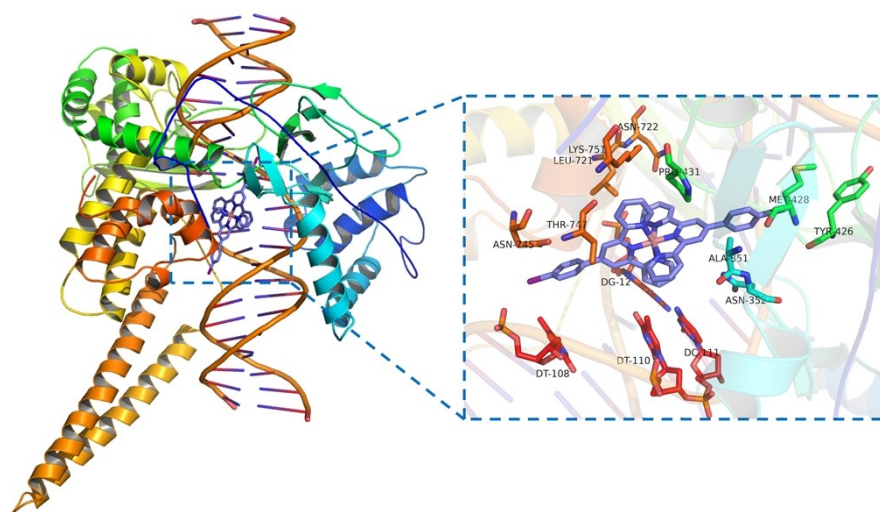

**Figure S35.** Binding modes of complex **6** with Top I (PDB ID: 1T8I).

**Table S1.** Selected geometric parameters of the complexes.

| Complex                                             | 1                                                                | 2                                                                               | 3                                                                                 | 4                                                                | 5                                                                                | 6                                                                                              |
|-----------------------------------------------------|------------------------------------------------------------------|---------------------------------------------------------------------------------|-----------------------------------------------------------------------------------|------------------------------------------------------------------|----------------------------------------------------------------------------------|------------------------------------------------------------------------------------------------|
| Empirical formula                                   | C <sub>42</sub> H <sub>30</sub> Cl <sub>2</sub> CoN <sub>6</sub> | C <sub>44</sub> H <sub>34</sub> Cl <sub>2</sub> CoN <sub>6</sub> O <sub>2</sub> | C <sub>44</sub> H <sub>34</sub> Cl <sub>2</sub> CoN <sub>6</sub> O <sub>4</sub> S | C <sub>44</sub> H <sub>34</sub> Cl <sub>2</sub> CoN <sub>6</sub> | C <sub>42</sub> H <sub>28</sub> Br <sub>2</sub> Cl <sub>2</sub> CoN <sub>6</sub> | C <sub>42</sub> H <sub>31</sub> Cl <sub>2</sub> CoI <sub>2</sub> N <sub>6</sub> O <sub>3</sub> |
| Formula weight                                      | 748.55                                                           | 808.6                                                                           | 904.72                                                                            | 776.6                                                            | 906.35                                                                           | 1051.36                                                                                        |
| Temperature                                         | 296(2) K                                                         | 296(2) K                                                                        | 296(2) K                                                                          | 296(2) K                                                         | 296(2)                                                                           | 298 K                                                                                          |
| Crystal system                                      | Triclinic                                                        | Triclinic                                                                       | Triclinic                                                                         | Tetragonal                                                       | Monoclinic                                                                       | Monoclinic                                                                                     |
| Space group                                         | $P\bar{1}$                                                       | $P\bar{1}$                                                                      | $P\bar{1}$                                                                        | $I4_1/a$                                                         | $C2/c$                                                                           | $C2/c$                                                                                         |
| <i>a</i> (Å)                                        | 10.6413(7)                                                       | 10.725(2)                                                                       | 11.5679(4)                                                                        | 11.4940(5)                                                       | 24.649(4)                                                                        | 16.5178(9)                                                                                     |
| <i>b</i> (Å)                                        | 11.5087(6)                                                       | 11.525(2)                                                                       | 14.3215(5)                                                                        | 11.4940(5)                                                       | 9.6058(17)                                                                       | 14.7305(9)                                                                                     |
| <i>c</i> (Å)                                        | 19.8685(11)                                                      | 19.766(4)                                                                       | 15.9903(6)                                                                        | 35.533(4)                                                        | 23.874(3)                                                                        | 37.360(2)                                                                                      |
| $\alpha$ (°)                                        | 97.120(4)                                                        | 106.16(3)                                                                       | 73.603(3)                                                                         | 90                                                               | 90°                                                                              | 90                                                                                             |
| $\beta$ (°)                                         | 95.761(5)                                                        | 94.85(3)                                                                        | 76.313(3)                                                                         | 90                                                               | 118.391(19)°                                                                     | 92.850(5)                                                                                      |
| $\gamma$ (°)                                        | 111.838(6)                                                       | 97.02(3)                                                                        | 77.065(3)                                                                         | 90                                                               | 90°                                                                              | 90                                                                                             |
| Volume (Å <sup>3</sup> )                            | 2212.7(2)                                                        | 2311.0(9)                                                                       | 2433.90(16)                                                                       | 4694.3(6)                                                        | 4973.0(16)                                                                       | 9079.1(9)                                                                                      |
| <i>Z</i>                                            | 2                                                                | 2                                                                               | 2                                                                                 | 4                                                                | 4                                                                                | 8                                                                                              |
| Density (calculated) (Mg/m <sup>3</sup> )           | 1.124                                                            | 1.162                                                                           | 1.235                                                                             | 1.099                                                            | 1.211                                                                            | 1.538                                                                                          |
| Absorption coefficient (mm <sup>-1</sup> )          | 0.541                                                            | 0.526                                                                           | 0.592                                                                             | 0.512                                                            | 2.090                                                                            | 1.898                                                                                          |
| <i>F</i> (000)                                      | 770                                                              | 834                                                                             | 930                                                                               | 1604                                                             | 1812                                                                             | 4128                                                                                           |
| Crystal size (mm <sup>3</sup> )                     | 0.15 × 0.11 × 0.1                                                | 0.11 × 0.07 × 0.06                                                              | 0.1 × 0.07 × 0.07                                                                 | 0.1 × 0.07 × 0.05                                                | 0.14 × 0.12 × 0.12                                                               | 0.2 × 0.13 × 0.12                                                                              |
| $\theta_{\max}$ , $\theta_{\min}$ (°)               | 3.053, 29.494                                                    | 2.877, 29.525                                                                   | 2.756, 29.419°                                                                    | 3.398, 29.488°                                                   | 1.878, 29.328°                                                                   | 3.249, 29.420°                                                                                 |
| Index range <i>h</i> , <i>k</i> , <i>l</i>          | -13 ≤ <i>h</i> ≤ 9<br>-14 ≤ <i>k</i> ≤ 13<br>-27 ≤ <i>l</i> ≤ 26 | -13 ≤ <i>h</i> ≤ 10<br>-14 ≤ <i>k</i> ≤ 13<br>-27 ≤ <i>l</i> ≤ 25               | -15 ≤ <i>h</i> ≤ 15<br>-19 ≤ <i>k</i> ≤ 15<br>-21 ≤ <i>l</i> ≤ 21                 | -9 ≤ <i>h</i> ≤ 15<br>-9 ≤ <i>k</i> ≤ 15<br>-48 ≤ <i>l</i> ≤ 46  | -32 ≤ <i>h</i> ≤ 28<br>-13 ≤ <i>k</i> ≤ 12<br>-20 ≤ <i>l</i> ≤ 32                | -22 ≤ <i>h</i> ≤ 20<br>-20 ≤ <i>k</i> ≤ 19<br>-48 ≤ <i>l</i> ≤ 39                              |
| Reflections collected/unique                        | 20797                                                            | 24031                                                                           | 27736                                                                             | 12160                                                            | 12236                                                                            | 25664                                                                                          |
| Data/restraints/parameters                          | 10239 / 0 / 460                                                  | 10726 / 50 / 518                                                                | 11431 / 0 / 534                                                                   | 2882 / 0 / 127                                                   | 5700 / 159 / 277                                                                 | 10781 / 0 / 481                                                                                |
| Goodness-of-fit on <i>F</i> <sup>2</sup>            | 1.036                                                            | 1.06                                                                            | 1.037                                                                             | 1.058                                                            | 0.980                                                                            | 1.024                                                                                          |
| Final <i>R</i> indices [ <i>I</i> > 2σ( <i>I</i> )] | <i>R</i> 1 = 0.0672<br>w <i>R</i> 2 = 0.2052                     | <i>R</i> 1 = 0.0647<br>w <i>R</i> 2 = 0.1942                                    | <i>R</i> 1 = 0.0442<br>w <i>R</i> 2 = 0.1289                                      | <i>R</i> 1 = 0.0695<br>w <i>R</i> 2 = 0.2129                     | <i>R</i> 1 = 0.0793<br>w <i>R</i> 2 = 0.2111                                     | <i>R</i> 1 = 0.0638<br>w <i>R</i> 2 = 0.1677                                                   |
| <i>R</i> indices (all data)                         | <i>R</i> 1 = 0.0825<br>w <i>R</i> 2 = 0.2232                     | <i>R</i> 1 = 0.0812<br>w <i>R</i> 2 = 0.2147                                    | <i>R</i> 1 = 0.0550<br>w <i>R</i> 2 = 0.1376                                      | <i>R</i> 1 = 0.0945<br>w <i>R</i> 2 = 0.2407                     | <i>R</i> 1 = 0.1635<br>w <i>R</i> 2 = 0.2595                                     | <i>R</i> 1 = 0.0819<br>w <i>R</i> 2 = 0.1851                                                   |
| Largest diff. peak and hole (e Å <sup>-3</sup> )    | 0.559 and -1.062                                                 | 0.855 and -1.029                                                                | 1.067 and -0.515                                                                  | 0.915 and -0.296                                                 | 0.467 and -0.468                                                                 | 1.382 and -1.646                                                                               |

**Table S2.** Distribution coefficients of complexes **1-9**

| Complex  | Absorbance |       |       | C <sub>organic</sub> (µg/mL) |       |       | Log D <sub>7.4</sub> |
|----------|------------|-------|-------|------------------------------|-------|-------|----------------------|
|          | 1          | 2     | 3     | 1                            | 2     | 3     | Average              |
| <b>1</b> | 0.950      | 0.948 | 0.946 | 10.07                        | 10.05 | 10.02 | 0.612                |
| <b>2</b> | 0.637      | 0.638 | 0.639 | 10.08                        | 10.09 | 10.11 | 0.623                |
| <b>3</b> | 0.837      | 0.838 | 0.839 | 10.05                        | 10.06 | 10.07 | 0.615                |
| <b>4</b> | 0.970      | 0.970 | 0.969 | 10.17                        | 10.17 | 10.16 | 0.639                |
| <b>5</b> | 0.728      | 0.727 | 0.725 | 10.21                        | 10.20 | 10.17 | 0.645                |
| <b>6</b> | 0.774      | 0.773 | 0.773 | 10.14                        | 10.13 | 10.13 | 0.632                |
| <b>7</b> | 1.151      | 1.150 | 1.152 | 9.96                         | 9.95  | 9.97  | 0.593                |
| <b>8</b> | 0.764      | 0.762 | 0.761 | 10.07                        | 10.05 | 10.03 | 0.613                |
| <b>9</b> | 0.767      | 0.766 | 0.765 | 10.06                        | 10.05 | 10.04 | 0.613                |

**Table S3.** Hydrogen bond interactions for compounds **2, 3**.

| Compound | Receptor                   | Bonds formed       | Bond distance (Å) |
|----------|----------------------------|--------------------|-------------------|
| <b>2</b> | B-DNA (1BNA)               | O...H-N(DA-17)     | 2.2               |
|          | B-DNA (1BNA)               | O...H-N(DG-16)     | 2.8               |
|          | survivin (3UIH)            | O...H-N(ASN-119)   | 2.2               |
|          | survivin (3UIH)            | O...H-N(LYS-115)   | 2.3               |
|          | DNA-topoisomerase I (1T8I) | O-H...O (DLU-267)  | 3.0               |
|          | DNA-topoisomerase I (1T8I) | O...H-N( )         | 2.8               |
| <b>3</b> | B-DNA (1BNA)               | O-H...O2 (DA-17)   | 2.6               |
|          | B-DNA (1BNA)               | O2...H-N(DA-17)    | 2.5               |
|          | B-DNA (1BNA)               | O-H...O1 (DG-16)   | 2.1               |
|          | survivin (3UIH)            | O-H...O1 (LYS-112) | 2.8               |
|          | survivin (3UIH)            | O-H...O2 (LYS-112) | 3.0               |
|          | survivin (3UIH)            | O-H...O3 (SER-20)  | 3.0               |
|          | survivin (3UIH)            | O-H...O4 (SER-20)  | 3.6               |
|          | survivin (3UIH)            | O...H-N(LYS-23)    | 2.1               |
|          | DNA-topoisomerase I (1T8I) | O-H...O2 (DT-108)  | 3.5               |
|          | DNA-topoisomerase I (1T8I) | O-H...O2 (ANS-745) | 3.2               |
|          | DNA-topoisomerase I (1T8I) | O-H...O4 (TYR-426) | 3.0               |
|          | DNA-topoisomerase I (1T8I) | O...H-N(MET-428)   | 3.0               |



## Synthesis of complexes 1-9

4'-(substituted phenyl)-terpyridine ligands **L<sup>1</sup>-L<sup>9</sup>** were synthesized from each of the 4-substituted benzaldehyde and 2-acetylpyridine according to the literature. Complexes **1-9** were synthesized by the reaction of **L<sup>1</sup>-L<sup>9</sup>** with CoCl<sub>2</sub>·6H<sub>2</sub>O added in stoichiometric amounts, respectively, in a methanol-CH<sub>2</sub>Cl<sub>2</sub> solution.

**[Co(L<sup>1</sup>)<sub>2</sub>]Cl<sub>2</sub> (1).** A solution of CoCl<sub>2</sub>·6H<sub>2</sub>O (0.12 g, 0.48 mmol) in ethanol (10 mL) was added dropwise to a 10 mL dichloromethane solution of **L<sup>1</sup>** (0.10 g, 0.32 mmol) in a 50 mL flask, and stirred for 8 h at ambient temperature. A brown solid (0.075 g, 75% yield based on **L<sup>1</sup>**) was obtained upon filtration of the solution and washed with dichloromethane and dried in a desiccator. Anal. Calcd for C<sub>42</sub>H<sub>30</sub>N<sub>6</sub>CoCl<sub>2</sub>·3.75 CH<sub>2</sub>Cl<sub>2</sub>·2.1H<sub>2</sub>O: C, 49.73; H, 3.80; N, 7.60%. Found: C, 49.25; H, 3.36; N, 8.16 %. IR (KBr disc) (cm<sup>-1</sup>) (s = strong, m = medium, w = weak): 3057 (m, *ν*<sub>C-H</sub>), 1644 (m, *n*-pyridyl-H), 1602 (s), 1544 (m, *n*-pyridyl-H), 1474 (s, *n*-pyridyl-H), 1414 (s), 1246 (s, *β*<sub>C-H</sub>), 1162 (s, *β*<sub>C-H</sub>), 1017 (s, *β*<sub>C-H</sub>), 895 (m, *γ*<sub>C-H</sub>), 759 (m, *γ*<sub>C-H</sub>), 768 (s, *γ*<sub>C-H</sub>), 732 (m, *γ*<sub>C-H</sub>), 690 (m, *γ*<sub>C-H</sub>), 657 (m), 623 (m).

**[Co(L<sup>2</sup>)<sub>2</sub>]Cl<sub>2</sub> (2).** A solution of CoCl<sub>2</sub>·6H<sub>2</sub>O (0.11 g, 0.44 mmol) in ethanol (10 mL) was added dropwise to a solution of **L<sup>2</sup>** (0.10 g, 0.29 mmol) dissolved in dichloromethane (10 mL) in a 50 mL flask and stirred for 8 h at ambient temperature. A brown solid (0.067 g, 67% yield based on **L<sup>2</sup>**) was obtained upon filtration of the solution and washed with dichloromethane and dried in a desiccator. Anal. Calcd for C<sub>44</sub>H<sub>34</sub>N<sub>6</sub>O<sub>2</sub>CoCl<sub>2</sub>·2.1CH<sub>2</sub>Cl<sub>2</sub>: C, 56.10; H, 3.90; N, 8.51%. Found: C, 55.72; H, 4.12; N, 8.70 %. IR (KBr disc) (cm<sup>-1</sup>): 3057 (m, *ν*<sub>C-H</sub>), 2839 (w, *ν*<sub>C-H</sub>), 1599 (s, *n*-pyridyl-H), 1547 (w, *n*-pyridyl-H), 1519 (s, *n*-pyridyl-H), 1473 (s, *ν*<sub>C=C</sub>), 1434 (m, *ν*<sub>C=C</sub>), 1407 (m, *ν*<sub>C=C</sub>), 1366 (w, *ν*<sub>C=C</sub>), 1239 (s, *ν*<sub>Ar-O-Me</sub>), 1183 (s, *ν*<sub>Ar-O-Me</sub>), 1126 (w, *β*<sub>C-H</sub>), 1068 (m, *β*<sub>C-H</sub>), 1019 (s, *β*<sub>C-H</sub>), 890 (w, *γ*<sub>C-H</sub>), 839 (s, *γ*<sub>C-H</sub>), 790 (s, *γ*<sub>C-H</sub>), 748 (m, *γ*<sub>C-H</sub>), 727 (s, *γ*<sub>C-H</sub>), 657 (m), 639 (s).

**[Co(L<sup>3</sup>)<sub>2</sub>]Cl<sub>2</sub> (3).** A solution of CoCl<sub>2</sub>·6H<sub>2</sub>O (0.09 g, 0.38 mmol) in ethanol (10 mL) was added dropwise to a solution of **L<sup>3</sup>** (0.10 g, 0.29 mmol) dissolved in dichloromethane (10 mL) in a 50 mL flask and stirred for 8 h at ambient temperature. A brown solid (0.071 g, 71% yield based on **L<sup>3</sup>**) was obtained upon filtration of the solution and washed with dichloromethane and dried in a desiccator. Anal. Calcd for C<sub>44</sub>H<sub>34</sub>N<sub>6</sub>O<sub>4</sub>S<sub>2</sub>CoCl<sub>2</sub>·CH<sub>2</sub>Cl<sub>2</sub>: C, 54.61; H, 3.66; N, 8.49%. Found: C, 54.44; H, 3.20; N, 8.65 %. IR (KBr disc) (cm<sup>-1</sup>): 3059 (w, *ν*<sub>C-H</sub>), 2985 (w, *ν*<sub>C-H</sub>), 2905 (w, *ν*<sub>C-H</sub>), 1613 (s, *n*-pyridyl-H), 1548 (m, *n*-pyridyl-H), 1473 (s, *ν*<sub>C=C</sub>), 1428 (s, *ν*<sub>C=C</sub>), 1391 (s, *ν*<sub>C=C</sub>), 1289 (s, *ν*<sub>SO2</sub>), 1249 (w, *ν*<sub>SO2</sub>), 1141 (s, *ν*<sub>SO2</sub>), 1093 (m, *β*<sub>C-H</sub>), 1012 (m, *β*<sub>C-H</sub>), 983 (s, *γ*<sub>C-H</sub>), 900 (w, *γ*<sub>C-H</sub>), 838 (m, *γ*<sub>C-H</sub>), 796 (m, *ν*<sub>S-O</sub>), 774 (s, *γ*<sub>C-H</sub>), 732 (s, *γ*<sub>C-H</sub>), 676 (m), 657 (m), 636 (m).

**[Co(L<sup>4</sup>)<sub>2</sub>]Cl<sub>2</sub> (4).** A solution of CoCl<sub>2</sub>·6H<sub>2</sub>O (0.11 g, 0.46 mmol) in ethanol (10 mL) was added dropwise to a solution of **L<sup>4</sup>** (0.10 g, 0.31 mmol) dissolved in dichloromethane (10 mL) in a 50 mL flask and stirred for 8 h at ambient temperature. A brown solid (0.065 g, 65% yield based on **L<sup>4</sup>**)

was obtained upon filtration of the solution and washed with dichloromethane and dried in a desiccator. IR (KBr disc) ( $\text{cm}^{-1}$ ): 3057 (w,  $\nu_{\text{C-H}}$ ), 3022 (w,  $\nu_{\text{C-H}}$ ), 2918 (w,  $\nu_{\text{C-H}}$ ), 2864 (w,  $\nu_{\text{C-H}}$ ), 1602 (s, *n*-pyridyl-H), 1547 (m, *n*-pyridyl-H), 1473 (s,  $\nu_{\text{C=C}}$ ), 1428 (m,  $\nu_{\text{C=C}}$ ), 1403 (s,  $\nu_{\text{C=C}}$ ), 1251 (m,  $\beta_{\text{C-H}}$ ), 1013 (m,  $\beta_{\text{C-H}}$ ), 894 (w,  $\gamma_{\text{C-H}}$ ), 826 (m,  $\gamma_{\text{C-H}}$ ), 792 (s,  $\gamma_{\text{C-H}}$ ), 730 (s,  $\gamma_{\text{C-H}}$ ), 688 (w), 657 (m). **[Co(L<sup>5</sup>)<sub>2</sub>]Cl<sub>2</sub> (5).** A solution of CoCl<sub>2</sub>·6H<sub>2</sub>O (0.09 g, 0.39 mmol) in ethanol (10 mL) was added dropwise to a solution of L<sup>5</sup> (0.10 g, 0.26 mmol) dissolved in dichloromethane (10 mL) in a 50 mL flask and stirred for 8 h at ambient temperature. A brown solid (0.072 g, 72% yield based on L<sup>5</sup>) was obtained upon filtration of the solution and washed with dichloromethane and dried in a desiccator. Anal. Calcd for C<sub>42</sub>H<sub>28</sub>Br<sub>2</sub>N<sub>6</sub>CoCl<sub>2</sub>·2.2CH<sub>2</sub>Cl<sub>2</sub>·0.2H<sub>2</sub>O: C, 48.40; H, 3.01; N, 7.66%. Found: C, 47.96; H, 2.52; N, 8.06 %. IR (KBr disc) ( $\text{cm}^{-1}$ ): 3057 (w,  $\nu_{\text{C-H}}$ ), 1599 (s, *n*-pyridyl-H), 1545 (m, *n*-pyridyl-H), 1473 (s,  $\nu_{\text{C=C}}$ ), 1427 (m,  $\nu_{\text{C=C}}$ ), 1390 (m,  $\nu_{\text{C=C}}$ ), 1250 (m,  $\beta_{\text{C-H}}$ ), 1161 (w,  $\beta_{\text{C-H}}$ ), 1060 (m,  $\beta_{\text{C-H}}$ ), 1001 (s,  $\beta_{\text{C-H}}$ ), 893 (w,  $\gamma_{\text{C-H}}$ ), 827 (s,  $\gamma_{\text{C-H}}$ ), 792 (s,  $\gamma_{\text{C-H}}$ ), 729 (m,  $\gamma_{\text{C-H}}$ ), 658 (m,  $\nu_{\text{C-Br}}$ ), 639 (m).

**[Co(L<sup>6</sup>)<sub>2</sub>]Cl<sub>2</sub> (6).** A solution of CoCl<sub>2</sub>·6H<sub>2</sub>O (0.08 g, 0.34 mmol) in ethanol (10 mL) was added dropwise to a solution of L<sup>6</sup> (0.10 g, 0.23 mmol) dissolved in dichloromethane (10 mL) in a 50 mL flask and stirred for 8 h at ambient temperature. A brown solid (0.069 g, 69% yield based on L<sup>6</sup>) was obtained upon filtration of the solution and washed with dichloromethane and dried in a desiccator. Anal. Calcd for C<sub>42</sub>H<sub>28</sub>I<sub>2</sub>N<sub>6</sub>CoCl<sub>2</sub>·2.1CH<sub>2</sub>Cl<sub>2</sub>·1.8H<sub>2</sub>O: C, 43.73; H, 2.98; N, 6.94%. Found: C, 43.49; H, 2.97; N, 7.27 %. IR (KBr disc) ( $\text{cm}^{-1}$ ): 3059 (w,  $\nu_{\text{C-H}}$ ), 1599 (s, *n*-pyridyl-H), 1546 (m, *n*-pyridyl-H), 1473 (s,  $\nu_{\text{C=C}}$ ), 1429 (m,  $\nu_{\text{C=C}}$ ), 1392 (m,  $\nu_{\text{C=C}}$ ), 1250 (m,  $\beta_{\text{C-H}}$ ), 1158 (w,  $\beta_{\text{C-H}}$ ), 1065 (m,  $\beta_{\text{C-H}}$ ), 1005 (s,  $\beta_{\text{C-H}}$ ), 893 (w,  $\gamma_{\text{C-H}}$ ), 831 (s,  $\gamma_{\text{C-H}}$ ), 793 (s,  $\gamma_{\text{C-H}}$ ), 730 (m,  $\gamma_{\text{C-H}}$ ), 657 (m), 639 (m), 585 (w,  $\nu_{\text{C-I}}$ ).

**[Co(L<sup>7</sup>)<sub>2</sub>]Cl<sub>2</sub> (7).** A solution of CoCl<sub>2</sub>·6H<sub>2</sub>O (0.09 g, 0.39 mmol) in ethanol (10 mL) was added dropwise to a solution of L<sup>7</sup> (0.10 g, 0.26 mmol) dissolved in dichloromethane (10 mL) in a 50 mL flask and stirred for 8 h at ambient temperature. A brown solid (0.066 g, 66% yield based on L<sup>7</sup>) was obtained upon filtration of the solution and washed with dichloromethane and dried in a desiccator. Anal. IR (KBr disc) ( $\text{cm}^{-1}$ ): 3059 (w,  $\nu_{\text{C-H}}$ ), 1608 (w,  $\delta_{\text{C-H}}$ ), 1599 (s, *n*-pyridyl-H), 1545 (m, *n*-pyridyl-H), 1472 (s,  $\nu_{\text{C=C}}$ ), 1428 (m,  $\nu_{\text{C=C}}$ ), 1392 (m,  $\nu_{\text{C=C}}$ ), 1250 (m,  $\beta_{\text{C-H}}$ ), 1160 (w,  $\beta_{\text{C-H}}$ ), 1065 (m,  $\beta_{\text{C-H}}$ ), 1005 (s,  $\beta_{\text{C-H}}$ ), 894 (w,  $\gamma_{\text{C-H}}$ ), 830 (s,  $\gamma_{\text{C-H}}$ ), 792 (s,  $\gamma_{\text{C-H}}$ ), 730 (m,  $\gamma_{\text{C-H}}$ ), 700 (w), 657 (m), 638 (m).

**[Co(L<sup>8</sup>)<sub>2</sub>]Cl<sub>2</sub> (8).** A solution of CoCl<sub>2</sub>·6H<sub>2</sub>O (0.10 g, 0.44 mmol) in ethanol (10 mL) was added dropwise to a solution of L<sup>8</sup> (0.10 g, 0.29 mmol) dissolved in dichloromethane (10 mL) in a 50 mL flask and stirred for 8 h at ambient temperature. A brown solid (0.072 g, 72% yield based on L<sup>8</sup>) was obtained upon filtration of the solution and washed with dichloromethane and dried in a desiccator. Anal. Calcd for C<sub>42</sub>H<sub>28</sub>Cl<sub>2</sub>N<sub>6</sub>CoCl<sub>2</sub>·2.8CH<sub>2</sub>Cl<sub>2</sub>·2.6H<sub>2</sub>O: C, 48.82; H, 3.54; N, 7.62%.

Found: C, 48.44; H, 3.05; N, 8.17 %. IR (KBr disc) ( $\text{cm}^{-1}$ ): 3059 (w,  $\nu_{\text{C-H}}$ ), 1600 (s, *n*-pyridyl-H), 1547 (m, *n*-pyridyl-H), 1473 (s,  $\nu_{\text{C=C}}$ ), 1430 (m,  $\nu_{\text{C=C}}$ ), 1396 (m,  $\nu_{\text{C=C}}$ ), 1249 (m,  $\beta_{\text{C-H}}$ ), 1158 (w,  $\beta_{\text{C-H}}$ ), 1092 (m,  $\beta_{\text{C-H}}$ ), 1011 (s,  $\beta_{\text{C-H}}$ ), 897 (w,  $\gamma_{\text{C-H}}$ ), 835 (s,  $\gamma_{\text{C-H}}$ ), 793 (s,  $\gamma_{\text{C-H}}$ ), 730 (m,  $\nu_{\text{C-Cl}}$ ), 657 (m), 639 (m).

**[Co(L<sup>9</sup>)<sub>2</sub>]Cl<sub>2</sub> (9).** A solution of CoCl<sub>2</sub>·6H<sub>2</sub>O (0.1 g, 0.46 mmol) in ethanol (10 mL) was added dropwise to a solution of L<sup>9</sup> (0.10 g, 0.31 mmol) dissolved in dichloromethane (10 mL) in a 50 mL flask and stirred for 8 h at ambient temperature. A brown solid (0.070 g, 70% yield based on L<sup>9</sup>) was obtained upon filtration of the solution and washed with dichloromethane and dried in a desiccator. Anal. Calcd for C<sub>42</sub>H<sub>28</sub>F<sub>2</sub>N<sub>6</sub>CoCl<sub>2</sub>·2.1CH<sub>2</sub>Cl<sub>2</sub>·2.4H<sub>2</sub>O: C, 52.64; H, 3.71; N, 8.35%. Found: C, 52.46; H, 3.45; N, 8.78%. IR (KBr disc) ( $\text{cm}^{-1}$ ): 3069 (w,  $\nu_{\text{C-H}}$ ), 1599 (s, *n*-pyridyl-H), 1548 (m, *n*-pyridyl-H), 1518 (m,  $\nu_{\text{C=C}}$ ), 1473 (s,  $\nu_{\text{C=C}}$ ), 1433 (m,  $\nu_{\text{C=C}}$ ), 1400 (m,  $\nu_{\text{C=C}}$ ), 1231 (s,  $\nu_{\text{C-F}}$ ), 1167 (s,  $\beta_{\text{C-H}}$ ), 1013 (m,  $\beta_{\text{C-H}}$ ), 897 (w,  $\gamma_{\text{C-H}}$ ), 841 (s,  $\gamma_{\text{C-H}}$ ), 793 (s,  $\gamma_{\text{C-H}}$ ), 730 (m,  $\gamma_{\text{C-H}}$ ), 657 (m), 639 (m) and 572 (m).
